# Supplementary material for: Developing Novel Rice Genotypes Harboring Specific QTL Alleles Associated with High Grain Yield under Water Shortage Stress
Source: MDPI journal article supplement (doi:10.3390/plants10102219), 2021-10-19
Supplement: s1 [file s1]

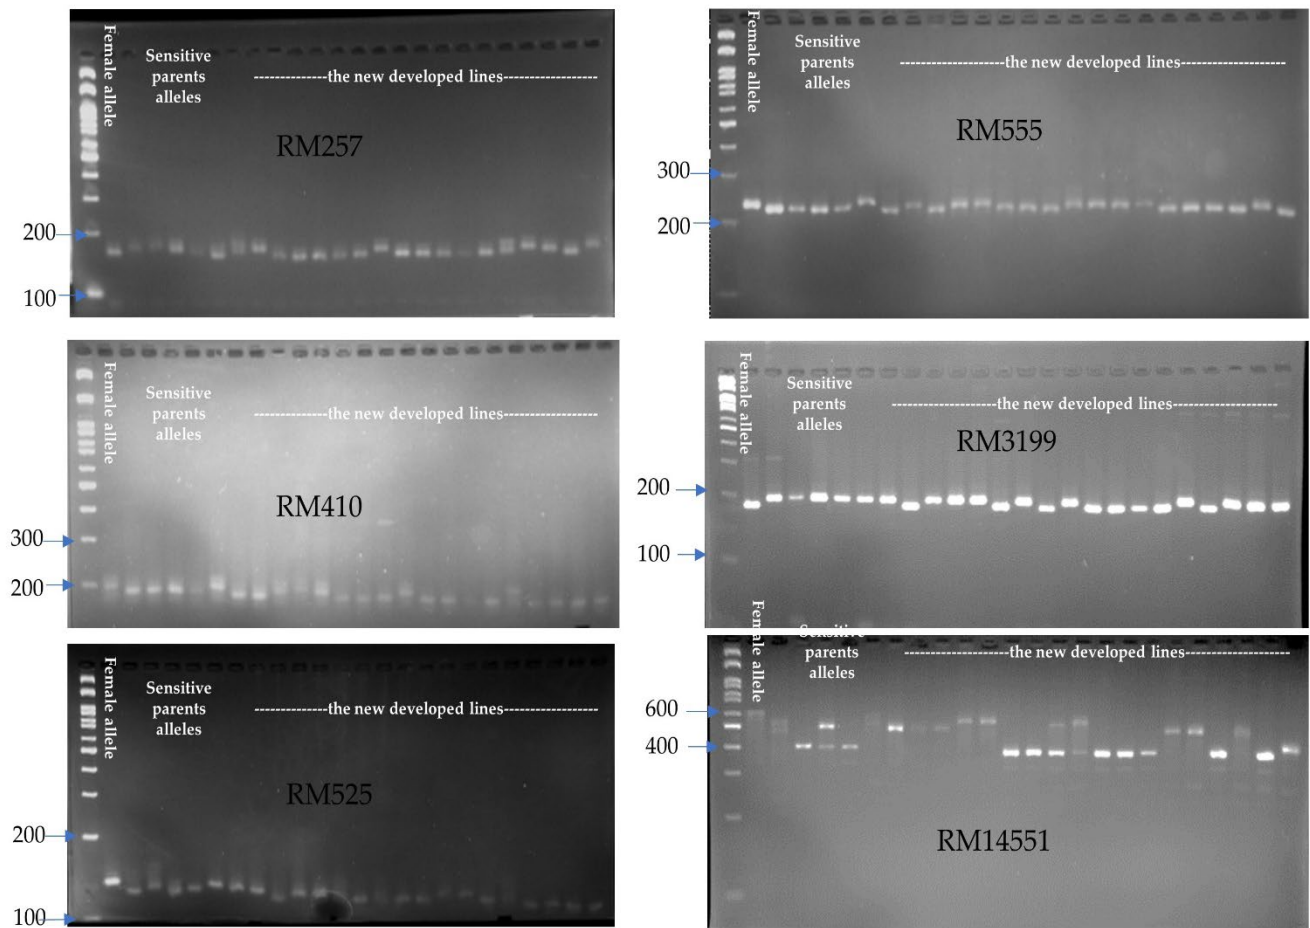

**Figure S1.** Banding pattern of the sex markers that showed high significant association with grain yield under water shortage stress. Lan 1: 100bp ladder; lane 2: M.J56 allele; lanes 3,4,5,6 Egyptian parents; Lanes 7:24 are the newly developed lines allele.

**Table S1.** Name and loci of markers co-localized with previously reported qDTY.

| Marker  | Chromosome No. | Locus   |          | QTL      | References |
|---------|----------------|---------|----------|----------|------------|
|         |                | cM*     | Kb**     |          |            |
| RM9     | 1              | 92.4    | 23322208 | qDTY1.1  | [1,2]      |
| RM543   | 1              | 145.6   | 32776801 | qDTY1.2  | [3]        |
| RM302   | 1              | 147.8   | 32981599 |          |            |
| RM212   | 1              | 148.7   | 33047896 |          |            |
| RM11943 | 1              |         | 37846103 | qDTY1.4  | [3]        |
| RM431   | 1              | 178.3   | 38888469 |          |            |
| RM3549  | 2              |         | 11388913 | qDTY2.1  | [4] [5]    |
| RM555   | 2              | 59.8    |          | qDTY2.2  | [3] [5]    |
| RM263   | 2              | 127.5   | 25889828 |          |            |
| RM525   | 2              | 143.7   | 28292005 |          |            |
| RM166   | 2              | 183     | .        |          |            |
| RM3894  | 3              | 3.9     | 10977    | qDTY3.1  | [4]        |
| RM14551 | 3              |         | 5402086  | 5402086  |            |
| RM3199  | 3              | 137.6   | 30221208 | qDTY3.2  | [3]        |
| RM416   | 3              | 191.6   |          |          |            |
| RM566   | 9              | 47.7    | 14651176 | qDTY9.1  | [3,5]      |
| RM24390 | 9              |         | 15942569 |          |            |
| RM7424  | 9              | 60.8    | 16527147 |          |            |
| RM410   | 9              | 64.4    | 17588741 |          |            |
| RM257   | 9              | 66.1    | 17666088 |          |            |
| RM242   | 9              | 73.3    | 18642201 |          |            |
| RM28048 | 12             | 45.2*** | 14153465 | qDTY12.1 | [6]        |
| RM28099 | 12             |         | 15896826 |          |            |
| RM511   | 12             | 55.5*** | 17442508 |          |            |
| RM277   | 12             | 57.2    |          |          |            |
| RM1261  | 12             | 57.5*** | 17578154 |          |            |
| RM28166 | 12             |         | 17654663 |          |            |
| RM260   | 12             | 61.7    |          |          |            |

\*Locus according to ([www.gramene.org](http://www.gramene.org); accessed on 28 November 2020); \*\* Locus according to [7]; \*\*\* Locus according to [6].

## References

1. Vikram, P.; Sta Cruz, T.; Espiritu, M.; Valle, M.; Singh, A.; Kumar, A. Major effect QTLs for grain yield under lowland drought stress. In Proceedings of the Poster presented at International Rice Genetics Symposium, 2009; pp. 16-19.
2. Ghimire, K.H.; Quiatchon, L.A.; Vikram, P.; Swamy, B.M.; Dixit, S.; Ahmed, H.; Hernandez, J.E.; Borromeo, T.H.; Kumar, A. Identification and mapping of a QTL (qDTY1. 1) with a consistent effect on grain yield under drought. Field Crops Research 2012, 131, 88-96.
3. Swamy, B.M.; Vikram, P.; Dixit, S.; Ahmed, H.; Kumar, A. Meta-analysis of grain yield QTL identified during agricultural drought in grasses showed consensus. BMC genomics 2011, 12, 1-18.

- 
4. Venuprasad, R.; Dalid, C.; Del Valle, M.; Zhao, D.; Espiritu, M.; Cruz, M.S.; Amante, M.; Kumar, A.; Atlin, G. Identification and characterization of large-effect quantitative trait loci for grain yield under lowland drought stress in rice using bulk-segregant analysis. *Theoretical and Applied Genetics* 2009, 120, 177-190.
  5. Dixit, S.; Swamy, B.M.; Vikram, P.; Bernier, J.; Cruz, M.S.; Amante, M.; Atri, D.; Kumar, A. Increased drought tolerance and wider adaptability of qDTY 12.1 conferred by its interaction with qDTY 2.3 and qDTY 3.2. *Mol. Breed.* 2012, 30, 1767–1779.
  6. Bernier, J.; Kumar, A.; Venuprasad, R.; Spaner, D.; Verulkar, S.; Mandal, N.P.; Sinha, P.K.; Peeraju, P.; Dongre, P.R.; Mahto, R. Characterization of the effect of a QTL for drought resistance in rice, qtl12. 1, over a range of environments in the Philippines and eastern India. *Euphytica* 2009, 166, 207–217.
  7. Project, I.R.G.S. The map-based sequence of the rice genome. *Nature* 2005, 436, 793–800.
